# Supplementary material
Source: PubMed Central journal article supplement (PMC3258896)

## Supplemental Figure and Movie Legends

**Supplemental Figure 1** (a) The  $\text{Ca}^{2+}$  bioluminescence (RLU/s) of cells expressing *Ce*\_PDFR-1a or b, measured for 30 seconds following the addition of 10  $\mu\text{M}$  or 1  $\mu\text{M}$  of synthetic peptides PDF-1a, PDF-1b or PDF-2, or reversed phase HPLC fractions 53 or 55 (1/20) from *C. elegans* whole body peptide extracts. After 30 seconds, Triton X-100 (0.1%) was added to measure the maximum remaining  $\text{Ca}^{2+}$  response of the cells. BSA medium was used as a negative control. (b) Dose-response curves for PDF-1a, PDF-1b and PDF-2 on receptor PDFR-1b, as measured with the  $\text{Ca}^{2+}$  bioluminescence assay.

**Supplemental Figure 2** Gene structure of differentially spliced gene C13B9.4 (*pdf-1*) with the exons of splice isoforms *pdf-1a*, *b* and *c* indicated in blue.

**Supplemental Movie 1** 3-D movie created from confocal Z-stack projections of transgenic N2 wild-type worms expressing GFP under the control of the promoter sequence from *pdf-1* (L1 hermaphrodite).

**Supplemental Movie 2** 3-D movie created from confocal Z-stack projections of transgenic N2 wild-type worms expressing GFP under the control of the promoter sequence from *pdf-1* (adult **male** head).

**Supplemental Movie 3** 3-D movie created from confocal Z-stack projections of transgenic N2 wild-type worms expressing GFP under the control of the promoter sequence from *pdf-1* (adult **male** tail).

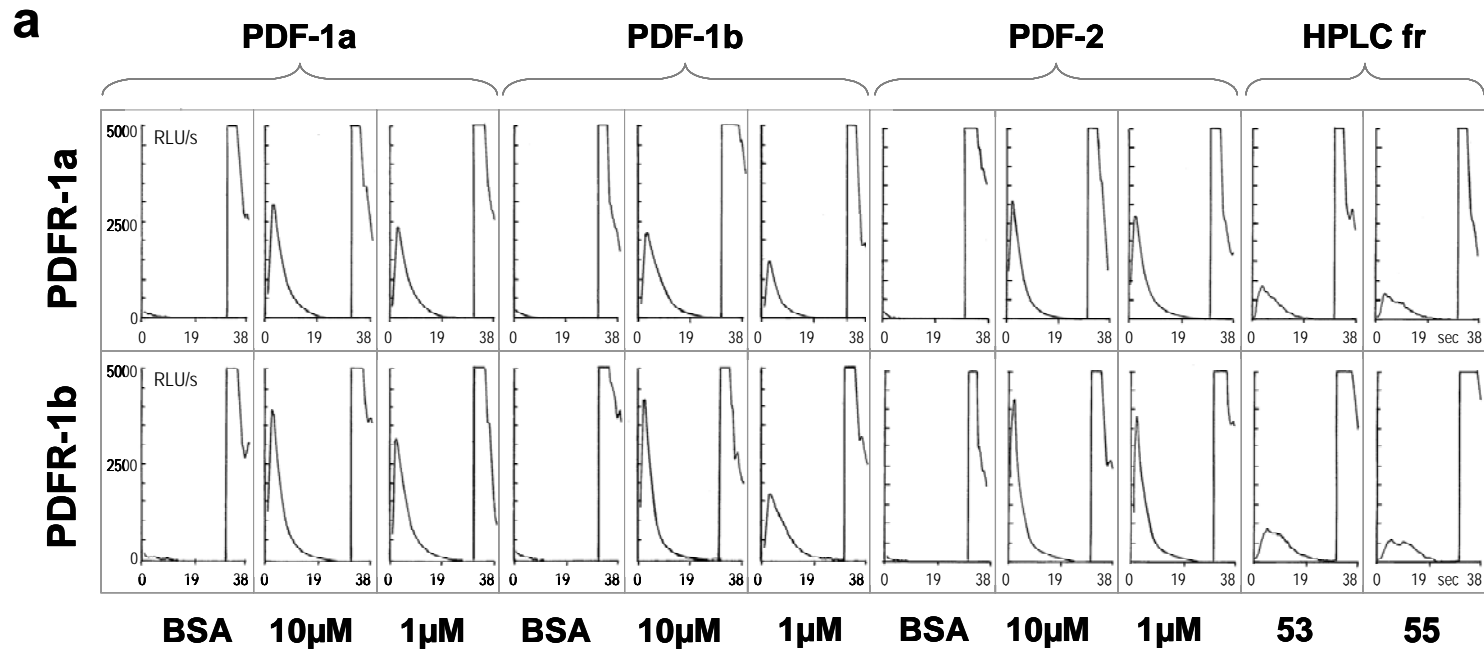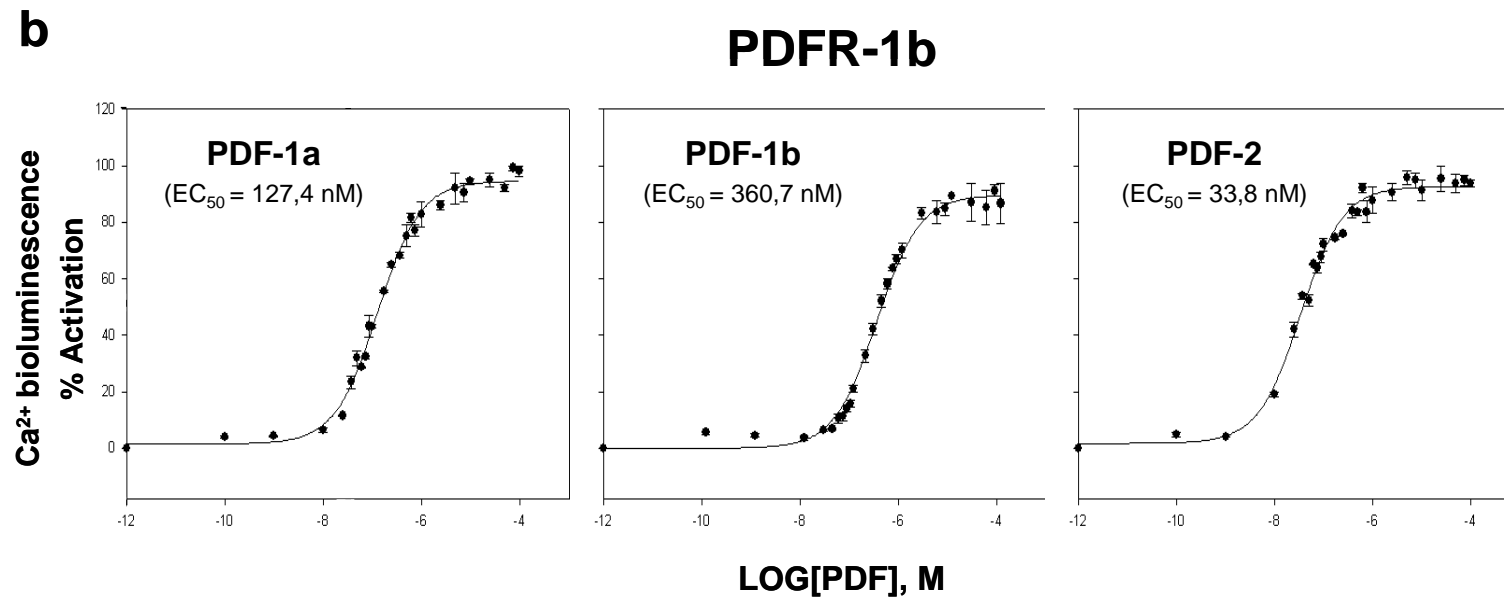

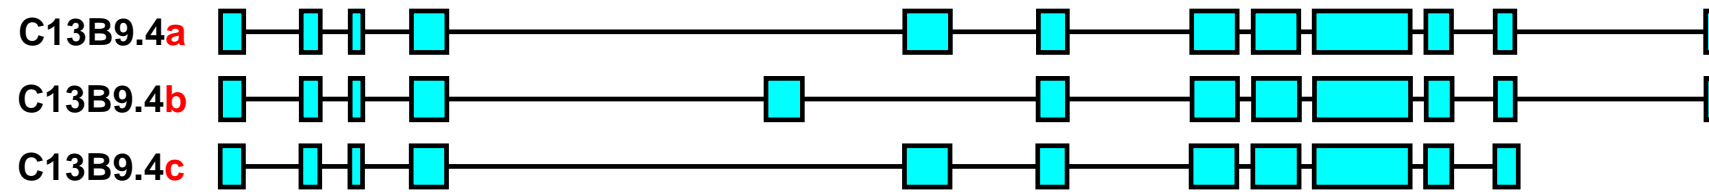

Supplement: M709060200_1.pdf [file M709060200_1.pdf]
