# Supplementary material
Source: PubMed Central journal article supplement (PMC3258896)
Supplement: M709060200_2.pdf [file M709060200_2.pdf]

Supplemental Table 1 Library of synthetic *C. elegans* FLP and NLP peptides.

| Gene          | Peptide sequence             | Gene                         | Peptide sequence            |
|---------------|------------------------------|------------------------------|-----------------------------|
| <i>nlp-1</i>  | MDANAFRMSFamide              | <i>nlp-28</i>                | GYGGYGGYamide               |
|               | MDPNAFRMSFamide              | <i>nlp-30</i>                | pQWGYGGYamide               |
| <i>nlp-2</i>  | SIALGRSGFRPamide             |                              | GYGGYamide                  |
|               | SMAMGRLGLRPamide             |                              | GMWamide                    |
|               | SMAYGRQGFRPamide             |                              | PYGGYGWamide                |
| <i>nlp-3</i>  | AINPFLDSMamide               | <i>nlp-32</i>                | YGGWGamide                  |
|               | AVNPFLDSIamide               |                              | GYGamide                    |
|               | YFDSLQSLamide                |                              | GGGWamide                   |
| <i>nlp-5</i>  | SVSQLNQYAGFDTLGGMGLamide     |                              | GGGamide                    |
|               | ALSFDLGGMGLamide             |                              | FGYGGamide                  |
|               | ALQHFSSLDLGGMGFamide         | <i>nlp-35</i>                | AVVSGYDNIYQVLAPRF           |
| <i>nlp-6</i>  | MAAPKQMYFGFamide             | <i>nlp-36</i>                | SMVARQIPQTVVADH             |
|               | APKQMVFGFamide               | <i>nlp-37 (pdf-2)</i>        | NNAEVVNHILKNFGALDRLGDVamide |
|               | AAMRSFNMGFamide              | <i>nlp-38</i>                | SPAQWQRANGLWamide           |
| <i>nlp-7</i>  | pQADFDDPRMFTSSFamide         |                              | TPQNWNKLNSLWamide           |
|               | LYLKQADFDDPRMFTSSFamide      |                              | ASDDRVLGWNKAHGLWamide       |
|               | SMDLDDPRLMTMSFamide          |                              | VLGWNKAHGLWamide            |
| <i>nlp-8</i>  | AFDRFDNSGVFSFGA              | <i>nlp-39</i>                | EVPNFQADNVPEAGGRV           |
|               | AFDRMDNSDFFGA                | <i>nlp-40</i>                | APSAPAGLEEKL                |
|               | SFDRMGGTEFGLM                | <i>nlp-41</i>                | APGLFELPSRSVRLI             |
| <i>nlp-9</i>  | GGARAFYGFYNAGNS              |                              |                             |
|               | GGGRAFNHNANLFRFD             | <i>pdf-1a</i>                | SNAELINGLIGMDLGKLSAVamide   |
|               | GGGRAFAGSWSPYLE              | <i>pdf-1b</i>                | SNAELINGLLSMNLNKLGAamide    |
| <i>nlp-10</i> | AIPFNGGMYamide               | <i>pdf-1</i> linkingpeptide  | SPLLYRAPQMYDDVQFV           |
|               | STMPFSGGMYamide              | <i>pdf-1</i> linkingpeptide' | SPLLYRAPQYQMYDDVQFV         |
|               | AAIPFSGGMYamide              |                              |                             |
|               | GAMPFSGGMYamide              | <i>flp-1</i>                 | SADPNFLRFamide              |
| <i>nlp-11</i> | HISPSYDVEIDAGNMRNLLDIamide   |                              | AAADPNFLRFamide             |
|               | SAPMASDYGNQFQMYNRLIDAamide   |                              | PNFLRFamide                 |
|               | SPAISPAYQFENAFGLSEALERAamide |                              | KPNFMRYamide                |
| <i>nlp-12</i> | DYRPLQFamide                 | <i>flp-2</i>                 | SPREPIRFamide               |

|               |                     |               |                     |
|---------------|---------------------|---------------|---------------------|
|               | DGYRPLQFamide       | <i>flp-3</i>  | SPLGTMRamide        |
| <i>nlp-13</i> | NDFSRDIMamide       |               | TPLGTMRamide        |
|               | pQPSYDRDIMamide     |               | EAEPLGTMRamide      |
|               | SSSMYDRDIMamide     |               | NPLGTMRamide        |
|               | SPVDYDRPIMamide     |               | ASEDALFGTMRamide    |
| <i>nlp-14</i> | ALDGLDGSFGFD        |               | EDGNAPFGTMRamide    |
|               | ALNSLDGAGFGFE       |               | SAEPFGTMRamide      |
|               | ALDGLDGSFGFD        |               | SADDSAPFGTMRamide   |
|               | ALNSLDGNGFGFD       |               | NPENDTPFGTMRamide   |
| <i>nlp-15</i> | AFDSLGSFGDNGFN      | <i>flp-4</i>  | PTFIRamide          |
|               | AFDSLGSFGAFN        |               | ASPSFIRamide        |
|               | AFDSLGSFGSGFD       | <i>flp-5</i>  | GAKFIRamide         |
|               | AFDSLGSFGFTGFE      | <i>flp-6</i>  | KSAYMRamide         |
|               | AFDTVSTSGFDDFKL     | <i>flp-7</i>  | SPMQRSSMVRamide     |
| <i>nlp-16</i> | STEHHRV             |               | TPMQRSSMVRamide     |
|               | SEGHPHE             |               | SPMERSAMVRamide     |
|               | ATHSPEGHIVAKDDHHGHE |               | SPMDRSKMVRamide     |
|               | SVDEHHGHQ           | <i>flp-9</i>  | KPSFVRamide         |
|               | NAEDHHEHQ           | <i>flp-10</i> | QPKARSGYIRamide     |
|               | SEHVEHQAEMHEHQ      | <i>flp-11</i> | AMRNALVRamide       |
|               | STQEVSGHPEHHLV      |               | ASGGMRNALVRamide    |
| <i>nlp-17</i> | GSLSNMMRIamide      |               | NGAPQPFVRamide      |
| <i>nlp-18</i> | ARYGFA              |               | SPLDEEDFAPESPLamide |
|               | ASPYGFAFA           | <i>flp-12</i> | RNKFEFIRamide       |
| <i>nlp-19</i> | IGLRLPNFL           | <i>flp-13</i> | SDRPTRAMDSPLIRamide |
|               | IGLRLPNML           |               | AADGAPLIRamide      |
|               | MGMRLPNIFL          |               | APEASPLIRamide      |
| <i>nlp-20</i> | FAFAFA              |               | ASPSAPLIRamide      |
|               | APKEFARFARASFA      |               | SPSAVPLIRamide      |
| <i>nlp-21</i> | GGARAMLH            |               | ASSAPLIRamide       |
|               | GGARAFSADVGDDY      |               | SAAAPLIRamide       |
|               | GGARAFLTEM          |               | AMDSPLIRamide       |
|               | GGARVFQGFED         | <i>flp-14</i> | KHEYLIRamide        |
|               | GGARAFMMD           |               | HEYLIRamide         |

|               |                     |               |                         |
|---------------|---------------------|---------------|-------------------------|
|               | GGGRAFGDMM          | <i>flp-15</i> | GGPQGPLRFamide          |
|               | GGGRSFPVKPGRLLD     |               | RGPSGPLRFamide          |
| <i>nlp-22</i> | SIAIGRAGFRPamide    |               | GPSGPLRFamide           |
| <i>nlp-23</i> | LYISRQGFRPA         | <i>flp-16</i> | AQTFVRFamide            |
|               | SMAIGRAGMRPamide    | <i>flp-18</i> | DFDGAMPGVLRamide        |
|               | AFAAGWNRamide       |               | SEVPGVLRamide           |
| <i>nlp-24</i> | pQWGGGYPYGGYGP      |               | DVPGVLRamide            |
|               | YGGYGamide          | <i>flp-19</i> | WANQVRFamide            |
|               | FTGYPYGGYGamide     | <i>flp-22</i> | SPSAKWRFamide           |
|               | GPYGGGGLVGALLamide  | <i>flp-24</i> | VPSAGDMMVRFamide        |
| <i>nlp-25</i> | pQWGGGYGNPYGGYamide | <i>flp-25</i> | DYDFVRFamide            |
| <i>nlp-26</i> | pQFGFGGQSFamide     | <i>flp-26</i> | EFNADDLTLRFamide        |
|               | GGFNGN              |               | GGAGEPLAFSPDMLSLRFamide |
|               | GGFGQSQFGamide      |               |                         |
|               | GGFGFamide          |               |                         |
