# Supplementary material
Source: PubMed Central journal article supplement (PMC3258896)
Supplement: M709060200_3.pdf [file M709060200_3.pdf]

**Supplemental Table 2 Neuronal distribution of PDFR-1**

| GENE          | NEURON                    | TYPE           | FUNCTION                      |
|---------------|---------------------------|----------------|-------------------------------|
| <i>pdfr-1</i> | ALM, FLP, OLQD, OLQV, PLM | sensory neuron | Mechanosensation (S1, S2, S5) |
|               | I1                        | interneuron    | pharynx pumping (S6)          |
|               | PHA, PHB                  | sensory neuron | Chemosensation (S3, S4)       |
|               | R3                        | sensory neuron | male mating behaviour (S7)    |
|               | RMED, RMEV                | motor neuron   | innervate head muscles (S3)   |

**Corresponding references:**

- S1. Chalfie, M. *et al.* (1985) *J. Neurosci.* **5**, 956-964.
- S2. Sawin, E.R., Ranganathan, R., and Horvitz, H.R. (2000) *Neuron* **26**, 619-631.
- S3. White, J.G., Southgate, E., Thomson, J.N., and Brenner, S. (1986) *Phil. Trans. R. Soc. Lond. B* **314**, 1-340.
- S4. Hilliard, M.A., Bargmann, C.I., and Bazzicalupo (2002) *PC Curr. Biol.* **12**, 730-734.
- S5. Kaplan, J.M., and Horvitz, H.R. (1993) *Proc. Natl. Acad. Sci. U. S. A* **90**, 2227-2231.
- S6. Avery, L., and Thomas, J.H. Feeding and Defecation in *C. elegans II* (eds. Riddle DL, Blumenthal T, Meyer BJ & Priess JR) 679-716 (Cold Spring Harbor Laboratory Press, New York, 1997).
- S7. Liu, K.S., and Sternberg, P.W. (1995) *Neuron* **14**, 79-89.
