# Supplementary material
Source: PubMed Central journal article supplement (PMC3258896)
Supplement: M709060200_4.pdf [file M709060200_4.pdf]

### Supplemental Table 3 PCR primers for transgenes

#### Primers for overexpression constructs

|              |   |                               |   |                              |
|--------------|---|-------------------------------|---|------------------------------|
| <i>pdf-1</i> | F | TTCACTACTTTCAGCGACCTTACTTGCTC | R | GAGAGACGGAGATTGACACGGTGGG    |
| <i>pdf-1</i> | F | CACAACCTCTGGATGCTGGCGATCG     | R | GAGCAGAACAGAATCGCATGTCAGAGC  |
| <i>pdf-2</i> | F | TGCCACAGATCGGCTTATGATTGC      | R | ACTTTTACTTGCCAACGTCTCCAAGTCG |
